# Supplementary material for: Unexpected diversity and a new species of Epizoanthus (Anthozoa, Hexacorallia) attached to eunicid worm tubes from the Pacific Ocean
Source: Zookeys. 2016 Feb 10;(562):49–71. doi: 10.3897/zookeys.562.6181 (PMC4768467; doi:10.3897/zookeys.562.6181)
Supplement: Supplementary material 2 — List of examined specimens, and GenBank accession numbers [file zookeys-562-049-s002.xlsx]

## Sheet: Sheet1
	Table 2. List of examined specimens, and GenBank accession numbers.
	Specimens ID	Genus	species	Locality	Coordinates		Collecter	sampling date	Depth (m)	COI	mt- 16S rDNA	ITS-rDNA
					Latitude	Longitude
	HK3	Epizoanthus	illoricatus	Siaes Tunnel, Palau	7°18'54.8"N	134°13'13.3"E	J.D. Reimer	2013-03-06	20.5	-	-	KU175739
	HK4	Epizoanthus	illoricatus	Cape Manzamo, Onna, Okinawa, Japan	26°30'18.3"N	127°51'02.3"E	J.D. Reimer	2007-12-13	30.4	-	KU175693	KU175740
	HK5	Epizoanthus	illoricatus	Cape Manzamo, Onna, Okinawa, Japan	26°30'18.3"N	127°51'02.3"E	J.D. Reimer	2007-12-13	21	-	KU175694	KU175741
	HK6	Epizoanthus	beriber	Mascot Channel, Tungelo Island, Bismark Archipelago, Papua New Guinea	-	-	L. Kirkendale	2003	3-30	-	-	KU175779
	HK7	Epizoanthus	illoricatus	Cape Manzamo, Onna, Okinawa, Japan	26°30'18.3"N	127°51'02.3"E	J.D. Reimer	2008-09-08	30.1	-	KU175695	KU175742
	HK8	Epizoanthus	illoricatus	Cape Manzamo, Onna, Okinawa, Japan	26°30'18.3"N	127°51'02.3"E	J.D. Reimer	2008-09-08	NA	-	KU175696	KU175743
	HK9	Epizoanthus	inazuma	Cape Manzamo, Onna, Okinawa, Japan	26°30'18.3"N	127°51'02.3"E	J.D. Reimer	2008-10-21	25	KU175781	KU175735	KU175771
	HK11	Epizoanthus	illoricatus	Cape Manzamo, Onna, Okinawa, Japan	26°30'18.3"N	127°51'02.3"E	J.D. Reimer	2015-12-21	35	KU175785	-	-
	HK23	Epizoanthus	illoricatus	Cape Manzamo, Onna, Okinawa, Japan	26°30'18.3"N	127°51'02.3"E	H. Kise	2008-12-12	35	KU175786	KU175697	KU175745
	HK24	Epizoanthus	illoricatus	Cape Manzamo, Onna, Okinawa, Japan	26°30'18.3"N	127°51'02.3"E	H. Kise	2008-12-12	35	KU175787	KU175698	KU175746
	HK28	Epizoanthus	illoricatus	Cape Manzamo, Onna, Okinawa, Japan	26°30'18.3"N	127°51'02.3"E	H. Kise	2008-12-19	NA	KU175788	KU175699	KU175747
	HK29	Epizoanthus	illoricatus	Cape Manzamo, Onna, Okinawa, Japan	26°30'18.3"N	127°51'02.3"E	H. Kise	2008-12-19	NA	KU175789	KU175700	KU175748
	HK42	Epizoanthus	illoricatus	Cape Manzamo, Onna, Okinawa, Japan	26°30'18.3"N	127°51'02.3"E	H. Kise	2014-04-05	30	KU175790	KU175701	KU175749
	HK43	Epizoanthus	inazuma	Cape Manzamo, Onna, Okinawa, Japan	26°30'18.3"N	127°51'02.3"E	H. Kise	2014-04-05	30	KU175782	KU175736	KU175770
	HK44	Epizoanthus	illoricatus	Cape Manzamo, Onna, Okinawa, Japan	26°30'18.3"N	127°51'02.3"E	H. Kise	2014-04-05	30	KU175791	-	KU175750
	HK45	Epizoanthus	illoricatus	Cape Manzamo, Onna, Okinawa, Japan	26°30'18.3"N	127°51'02.3"E	H. Kise	2014-05-19	30.4	KU175792	KU175703	KU175751
	HK46	Epizoanthus	illoricatus	Cape Manzamo, Onna, Okinawa, Japan	26°30'18.3"N	127°51'02.3"E	H. Kise	2014-05-19	23.5	KU175793	KU175704	KU175752
	HK47	Epizoanthus	illoricatus	Cape Manzamo, Onna, Okinawa, Japan	26°30'18.3"N	127°51'02.3"E	H. Kise	2014-05-19	23.5	KU175794	-	KU175754
	HK48	Epizoanthus	illoricatus	Cape Manzamo, Onna, Okinawa, Japan	26°30'18.3"N	127°51'02.3"E	H. Kise	2014-05-19	25	KU175795	KU175705	KU175753
	HK49	Epizoanthus	illoricatus	Cape Zanpa, Yomitan, Okinawa, Japan	26°26'26.5"N	127°42'43.7"E	H. Kise	2014-06-29	34.5	-	KU175706	KU175755
	HK50	Epizoanthus	illoricatus	Cape Manzamo, Onna, Okinawa, Japan	26°30'18.3"N	127°51'02.3"E	H. Kise	2014-07-19	30	-	KU175707	-
	HK51	Epizoanthus	illoricatus	Cape Manzamo, Onna, Okinawa, Japan	26°30'18.3"N	127°51'02.3"E	H. Kise	2014-07-19	23.5	-	KU175708	-
	HK52	Epizoanthus	illoricatus	Cape Manzamo, Onna, Okinawa, Japan	26°30'18.3"N	127°51'02.3"E	H. Kise	2014-07-19	25.8	-	KU175709	-
	HK53	Epizoanthus	illoricatus	Cape Manzamo, Onna, Okinawa, Japan	26°30'18.3"N	127°51'02.3"E	H. Kise	2014-07-19	24.5	-	KU175710	-
	HK54	Epizoanthus	inazuma	Cape Manzamo, Onna, Okinawa, Japan	26°30'18.3"N	127°51'02.3"E	H. Kise	2014-07-21	23.5	KU175783	KU175738	-
	HK55	Epizoanthus	illoricatus	Cape Manzamo, Onna, Okinawa, Japan	26°30'18.3"N	127°51'02.3"E	H. Kise	2014-07-21	25	KU175796	KU175711	-
	HK56	Epizoanthus	illoricatus	Cape Manzamo, Onna, Okinawa, Japan	26°30'18.3"N	127°51'02.3"E	H. Kise	2014-07-21	27	-	KU175712	-
	HK57	Epizoanthus	illoricatus	Cape Manzamo, Onna, Okinawa, Japan	26°30'18.3"N	127°51'02.3"E	H. Kise	2014-07-21	27	KU175797	KU175714	-
	HK58	Epizoanthus	illoricatus	Cape Manzamo, Onna, Okinawa, Japan	26°30'18.3"N	127°51'02.3"E	H. Kise	2014-07-21	25	KU175798	KU175715	KU175756
	HK59	Epizoanthus	illoricatus	Cape Manzamo, Onna, Okinawa, Japan	26°30'18.3"N	127°51'02.3"E	H. Kise	2014-07-21	30	KU175799	KU175716	-
	HK61	Epizoanthus	illoricatus	Cape Manzamo, Onna, Okinawa, Japan	26°30'18.3"N	127°51'02.3"E	H. Kise	2014-07-21	25	-	KU175717	-
	HK62	Epizoanthus	illoricatus	Bise, Motobu, Okinawa, Japan	26°42'34.4"N	127°52'49.2"E	H. Kise	2014-07-23	34.2	KU175800	KU175718	KU175757
	HK63	Epizoanthus	illoricatus	Bise, Motobu, Okinawa, Japan	26°42'34.4"N	127°52'49.2"E	H. Kise	2014-07-23	32	KU175801	KU175722	KU175758
	HK64	Epizoanthus	illoricatus	Bise, Motobu, Okinawa, Japan	26°42'34.4"N	127°52'49.2"E	H. Kise	2014-07-23	34	-	KU175723	KU175759
	HK66	Epizoanthus	inazuma	Cape Zanpa, Yomitan, Okinawa, Japan	26°26'26.5"N	127°42'43.7"E	H. Kise	2014-08-05	34.4	KU175784	KU175737	KU175769
	HK67	Epizoanthus	illoricatus	Siaes Tunnel, Palau	7°18'54.8"N	134°13'13.3"E	J.D. Reimer	2014-09-12	35	KU175802	KU175724	KU175760
	HK68	Epizoanthus	illoricatus	Siaes Tunnel, Palau	7°18'54.8"N	134°13'13.3"E	J.D. Reimer	2014-09-12	35	-	KU175725	KU175761
	HK71	Epizoanthus	illoricatus	Short Drop-off, Palau	7°15'34.7"N	134°31'6.4"E	H. Kise	2014-09-13	24.8	-	-	KU175762
	HK72	Epizoanthus	illoricatus	Short Drop-off, Palau	7°15'34.7"N	134°31'6.4"E	H. Kise	2014-09-13	30.3	-	KU175726	-
	HK73	Epizoanthus	illoricatus	Short Drop-off, Palau	7°15'34.7"N	134°31'6.4"E	H. Kise	2014-09-13	33	-	KU175719	KU175763
	HK74	Epizoanthus	illoricatus	Short Drop-off, Palau	7°15'34.7"N	134°31'6.4"E	H. Kise	2014-09-13	25.4	KU175803	KU175720	KU175764
	HK75	Epizoanthus	illoricatus	Short Drop-off, Palau	7°15'34.7"N	134°31'6.4"E	H. Kise	2014-09-13	13	KU175804	KU175721	KU175765
	HK77	Epizoanthus	illoricatus	Short Drop-off, Palau	7°15'34.7"N	134°31'6.4"E	H. Kise	2014-09-13	28	KU175805	-	KU175766
	HK78	Epizoanthus	illoricatus	Siaes Corner, Palau	7°20'8.2"N	134°12'54.6"E	H. Kise	2014-09-14	40.3	-	KU175702	KU175767
	HK80	Epizoanthus	illoricatus	Siaes Corner, Palau	7°20'8.2"N	134°12'54.6"E	H. Kise	2014-09-14	27.9	KU175806	KU175713	KU175768
	HK81	Epizoanthus	illoricatus	Siaes Corner, Palau	7°20'8.2"N	134°12'54.6"E	H. Kise	2014-09-14	13.1	KU175807	-	-
	HK82	Epizoanthus	illoricatus	Blue Corner, Palau	7°20'8.2"N	134°12'54.6"E	H. Kise	2014-09-14	31.7	KU175809	-	-
	HK85	Epizoanthus	illoricatus	Siaes Tunnel, Palau	7°18'54.8"N	134°13'13.3"E	H. Kise	2014-09-15	38.5	KU175808	-	-
	HK86	Epizoanthus	illoricatus	Siaes Tunnel, Palau	7°18'54.8"N	134°13'13.3"E	H. Kise	2014-09-15	37.9	KU175810	-	-
	HK88	Epizoanthus	illoricatus	Siaes Tunnel, Palau	7°18'54.8"N	7°18'54.8"N	H. Kise	2014-09-15	28	KU175811	-	-
	HK100	Epizoanthus	illoricatus	Cape Manzamo, Onna, Okinawa, Japan	26°30'18.3"N	127°51'02.3"E	H. Kise	2015-11-21	25	KU175812	-	-
	HK101	Epizoanthus	illoricatus	Cape Manzamo, Onna, Okinawa, Japan	26°30'18.3"N	127°51'02.3"E	H. Kise	2015-11-21	35	KU175813	-	-
	HK102	Epizoanthus	illoricatus	Cape Manzamo, Onna, Okinawa, Japan	26°30'18.3"N	127°51'02.3"E	H. Kise	2015-11-21	30	KU175814	-	-
	HK104	Epizoanthus	illoricatus	Loyalty Islands, New Caledonia	26°37'44.8"N	166°16'25.2"E	B. Hoeksema	2014-02-21	15	KU175815	-	-
	HK105	Epizoanthus	illoricatus	Short Drop-off, Palau	7°15'34.7"N	134°31'6.4"E	H. Kise	2015-04-27	32.1	KU175816	-	-
	HK112	Epizoanthus	beriber	Siaes Tunnel, Palau	7°18'54.8"N	134°13'13.3"E	H. Kise	2015-04-28	37	KU175817	-	-
	HK113	Epizoanthus	beriber	Siaes Tunnel, Palau	7°18'54.8"N	134°13'13.3"E	H. Kise	2015-04-28	31.9	KU175818	KU175728	-
	HK114	Epizoanthus	illrocatus	Siaes Tunnel, Palau	7°18'54.8"N	134°13'13.3"E	H. Kise	2015-04-28	29.5	KU175819	KU175727	-
	HK116	Epizoanthus	beriber	Siaes Tunnel, Palau	7°18'54.8"N	134°13'13.3"E	H. Kise	2015-04-28	NA	KU175820	KU175729	KU175772
	HK117	Epizoanthus	beriber	Siaes Tunnel, Palau	7°18'54.8"N	134°13'13.3"E	H. Kise	2015-04-28	NA	KU175821	KU175730	KU175777
	HK118	Epizoanthus	beriber	Siaes Tunnel, Palau	7°18'54.8"N	134°13'13.3"E	H. Kise	2015-04-28	NA	KU175822	KU175731	KU175778
	HK119	Epizoanthus	beriber	Siaes Tunnel, Palau	7°18'54.8"N	134°13'13.3"E	H. Kise	2015-04-28	18.6	KU175823	-	KU175776
	HK120	Epizoanthus	beriber	Siaes Tunnel, Palau	7°18'54.8"N	134°13'13.3"E	H. Kise	2015-04-28	NA	KU175824	-	KU175773
	HK124	Epizoanthus	beriber	Ngeruangel, Palau	8°19'00.0"N	134°63'00.0"E	H. Kise	2015-04-29	26.6	KU175825	KU175732	-
	HK125	Epizoanthus	beriber	Blue Hole, Palau	7°8'29.4"N	134°13'23.3"E	H. Kise	2015-05-05	32.2	KU175826	-	KU175775
	HK126	Epizoanthus	beriber	Blue Hole, Palau	7°8'29.4"N	134°13'23.3"E	H. Kise	2015-05-05	35.8	KU175827	-	-
	HK127	Epizoanthus	beriber	Blue Hole, Palau	7°8'29.4"N	134°13'23.3"E	H. Kise	2015-05-05	35.5	KU175828	KU175733	KU175774
	HK128	Epizoanthus	beriber	Blue Corner, Palau	7°8'12.3"N	134°13'16.5"E	H. Kise	2015-05-05	29.3	KU175829	KU175734	-
	HK129	Epizoanthus	beriber	Turtle Cove, Palau	7°5'05.7"N	134°15'47.0"E	H. Kise	2015-05-06	20.1	KU175830	-	-
	HPD1335	Epizoanthus	aff. illoricatus	Kodakarajima, Nansei Islands, Amami, Japan	29°10'31.3"N	129°20'51.9"E	T. Fujii	2011-10-21	114	-	-	KU175780
